# Supplementary material for: Progression of Truncal Valve regurgitation during fetal life: a retrospective multicenter study
Source: Research Square preprint supplement (doi:10.21203/rs.3.rs-6339803/v1), 2025-05-06
Supplement: Supplementary file 1 [file 3340d7892500b11f8915d313.docx]

**Table 1. Maternal and Fetal General characteristics**

| **Maternal and Fetal characteristics** | **Total (n= 33)** |
| --- | --- |
| Maternal age (years) | 28.9 ± 6.4 |
| Male | 21 (63.6%) |
| Gestational age at delivery (weeks) | 35.6 ± 2.6 |
| Twin gestational pregnancies | 4 (12%) |
| Gestational age at 2nd trimester fetal echocardiogram (weeks) | 23.3 ± 2.7 |
| Gestational age at 3rd trimester fetal echocardiogram (weeks) | 33.2 ± 1.9 |
| Weight at birth (kilograms) | 2.6 ± 0.7 |
| Truncus Classification |  |
| - Collet and Edwards Type I | 15 (45.5%) |
| - Collet and Edwards Type II | 9 (27.3%) |
| - Collet and Edwards Type III | 2 (6.1%) |
| - Collet and Edwards Type IV | 7 (21.2%) |
| Right aortic arch | 12 (36%) |
| Coronary abnormalities | 9 (33%) |
| Unicuspid Valve | 0 (0%) |
| Bicuspid Valve | 8(25.8%) |
| Tricuspid Valve | 14(45.2%) |
| Quadricuspid Valve | 9(29.0%) |
| Neonatal Death | 6 (18%) |
| IUFD | 2 (6%) |
| Alive in the neonatal period | 25 (75%) |

Legend: Values reported as number (percentage of cohort) for categorical variables and mean (± standard deviation) for continuous variable. IUFD=Intrauterine Fetal Demise
