# Supplementary material for: Progression of Truncal Valve regurgitation during fetal life: a retrospective multicenter study
Source: Research Square preprint supplement (doi:10.21203/rs.3.rs-6339803/v1), 2025-05-06
Supplement: Supplementary file 2 [file 35cf9dac2b27aa1aa491fc7f.docx]

**Tabe 3-Echocardiography findings**

| **Echocardiographic variable** | **First echocardiogram** | **Second echocardiogram** |
| --- | --- | --- |
| Atrioventricular valve regurgitation (all degrees) | 3 (13%) | 2(6%) |
| Pericardial effusion | 1 (7%) | 2 (8%) |
| Ascites | 1 (7%) | 1 (3%) |
| Cardiomegaly | 0 (0%) | 1 (3%) |
| Qualitative LV systolic dysfunction | 1 (7%) | 1 (3%) |
| Qualitative RV systolic dysfunction | 0 (0%) | 0 (0%) |
| CVP score < 7 | 1 (7%) | 1 (3%) |
| Truncal valve size (mm) | 6 ± 1.4 | 8 ± 1.73 |
| Truncal valve stenosis | 0 (0 %) | 3 (10%) |
| Absent ductus venosus | - | 2(7%) |

Values reported as number (percentage of cohort) for categorical variables and mean (± standard deviation) for continuous variable

Legend: LV= left ventricular; RV= Right ventricular; CVP = cardiovascular profile score;
