# Supplementary material for: Progression of Truncal Valve regurgitation during fetal life: a retrospective multicenter study
Source: Research Square preprint supplement (doi:10.21203/rs.3.rs-6339803/v1), 2025-05-06
Supplement: Supplementary file 3 [file 3612f07aca6c9a5dff426377.docx]

**Table 2- Progression of truncal valve regurgitation**

| Patient | Truncal valve regurgitation 2nd trimester | Truncal valve regurgitation 3rd trimester | Truncal regurgitation post natal |
| --- | --- | --- | --- |
| 1 | Mild | Mild | **Moderate** |
| 2 | Absent | Mild | Mild |
| 3 | NA | Absent | Mild |
| 4 | Absent | Mild | Mild |
| 5 | Mild | Mild | **Moderate** |
| 6 | NA | Mild | Mild |
| 7 | Mild | Mild | Mild |
| 8 | Absent | NA | Mild |
| 9 | Absent | Absent | Mild |
| 10 | Mild | **Moderate** | **Moderate** |
| 11 | Absent | NA | Mild |
| 12 | Mild | NA | Mild |
| 13 | NA | Absent | Mild |
| 14 | Mild | **Moderate** | **Moderate** |
| 15 | Mild | Mild | Mild |
| 16 | Mild | Mild | NA |
| 17 | Absent | Mild | NA |
| 18 | NA | Mild | Mild |
| 19 | NA | Mild | Mild |
| 20 | NA | Mild | **Moderate** |
| 21 | NA | Absent | Absent |
| 22 | NA | Mild | **Moderate** |
| 23 | Absent | Absent | Absent |
| 24 | Absent | Absent | Absent |
| 25 | Absent | Absent | Absent |
| 27 | Mild | Absent | Mild |
| 28 | Absent | Absent | Mild |
| 30 | Absent | Absent | Absent |
| 31 | Absent | Absent | Absent |
| 32 | Absent | Absent | Absent |
| 33 | Absent | Absent | Absent |
