# Supplementary material for: Progression of Truncal Valve regurgitation during fetal life: a retrospective multicenter study
Source: Research Square preprint supplement (doi:10.21203/rs.3.rs-6339803/v1), 2025-05-06
Supplement: Supplementary file 4 [file 3d08f1ff27a854abc6a4d63b.docx]

**Table 2- Genetic and extracardiac abnormalities**

| **Type** | **Number of fetus (n= 33)** |
| --- | --- |
| Any genetic abnormalities | 12 (36%) |
| 22q deletion syndrome | 8 (24%) |
| Any Extracardiac abnormalities | 17(51%) |
| VACTERAL Association | 2 (6%) |
